# Supplementary material for: Influence of TiO2 surface coating on the electrochemical properties of V2O5 micro-particles as a cathode material for lithium ion batteries
Source: Royal Society of Chemistry journal article supplement (doi:10.1039/c6ra12162d), 2016-01-01
Supplement: c6ra12162d1.pdf [file c6ra12162d1.pdf]

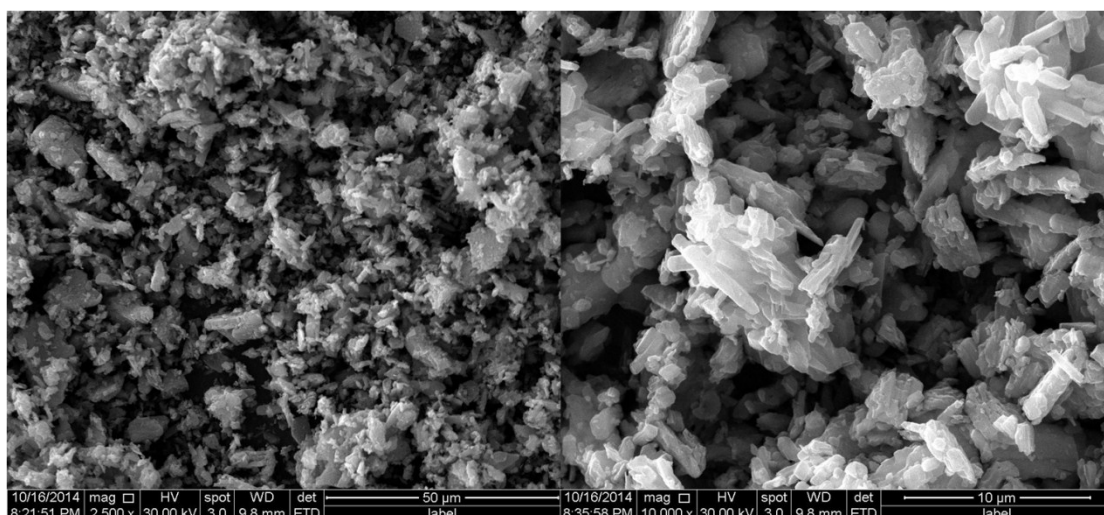

Fig.S1 SEM images of commercial  $V_2O_5$  powder with irregular appearance under different amplifications.

We can find from the above SEM images (Fig. S1) that the commercial  $V_2O_5$  powder displays irregular appearance, whose size ranges from a few microns to dozens of microns.

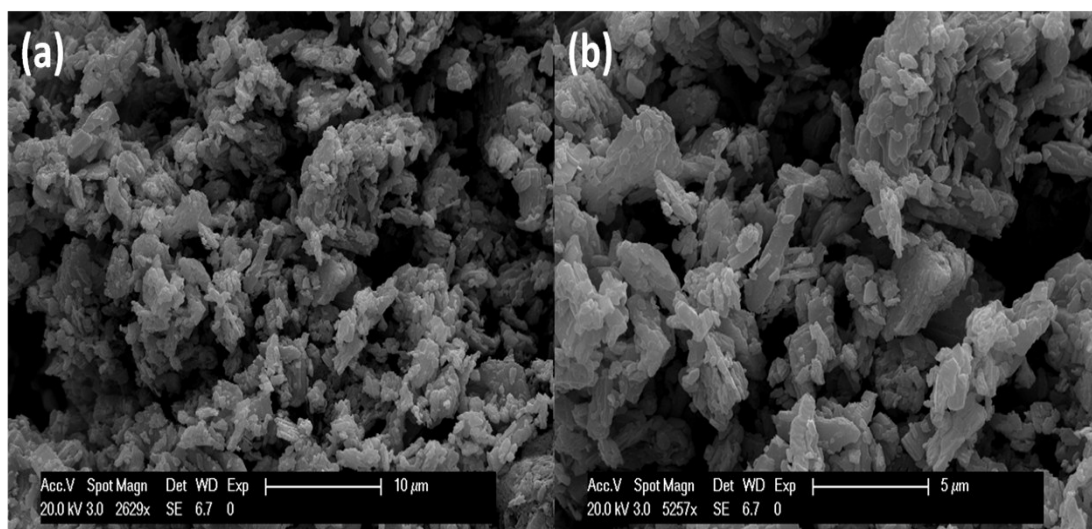

Figure S2. SEM images of commercial  $V_2O_5$  powder after mechanical ball milling at different magnifications.

Microscopic morphology of commercial  $V_2O_5$  powder after mechanical ball milling is illustrated in Fig. S2. It can be found that the size of irregular  $V_2O_5$  particles after milling become smaller than the raw one when we compare Fig. S2 (a) with Fig. S1 (b)

at the same magnification. Besides, the number of “little pieces” of  $V_2O_5$  powder with dimension less than  $1\ \mu\text{m}$  become more through ball milling. When the sintering process is conducted, these small “little pieces” would get closer to the large particle in the vicinity of them and develop into a larger  $V_2O_5$  particle with smooth surface as time goes on. This is because that the microscopic particles always tend to gather together and form larger particles under high temperature in order to reduce the overall surface energy. The agglomeration phenomena for many particulate materials are caused by this principle of minimum surface energy. Nevertheless, the extent of agglomeration is limited by treating temperature and physical property of material itself. So, here the appropriate treating temperature and heating rate could lead to the generation of smooth particle with proper size as shown in Fig. 1 of original manuscript.

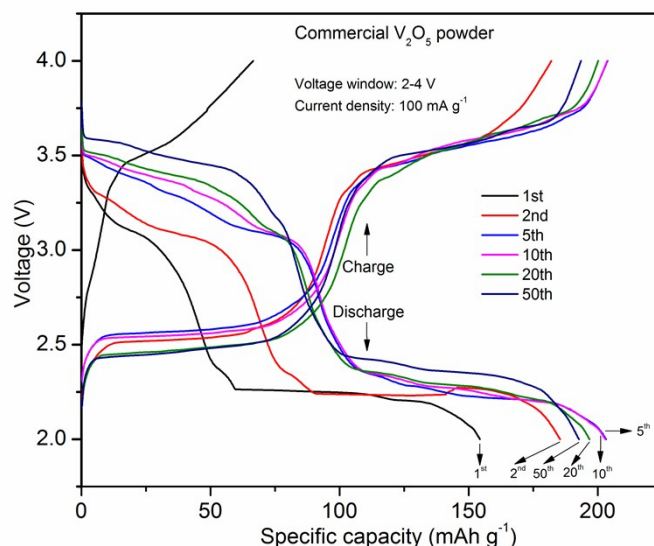

Figure S3. Selected charge-discharge curves of commercial  $V_2O_5$  powder cathode material without sintering and ball milling.

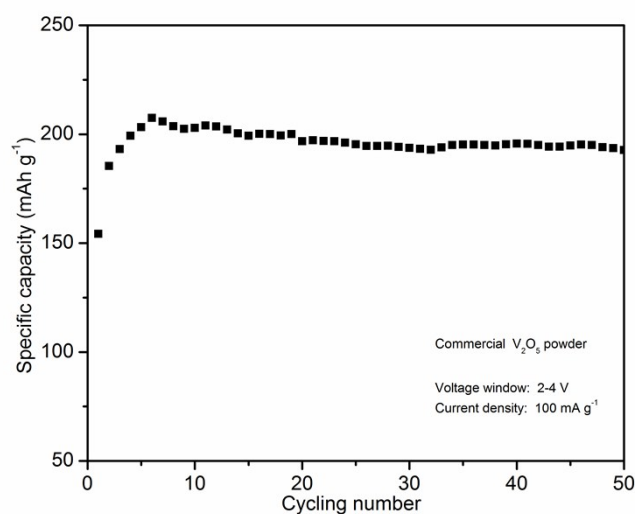

Figure S4. Cycling performance of commercial  $V_2O_5$  powder cathode material without sintering and ball milling between 2-4 V under the current density of  $100 \text{ mA g}^{-1}$ .

Fig. S3 gives the 1<sup>st</sup>, 2<sup>nd</sup>, 5<sup>th</sup>, 10<sup>th</sup>, 20<sup>th</sup> and 50<sup>th</sup> charge-discharge curves of raw  $V_2O_5$  powder cathode material without sintering and ball milling. The profile of these curves is similar to that of bare  $V_2O_5$  particle with milling and sintering as well as  $TiO_2$ -coated one. The cycling performance of raw  $V_2O_5$  powder without sintering and milling is presented in Fig. S4. It can be seen that raw  $V_2O_5$  powder shows an initial specific capacity of  $154.3 \text{ mAh g}^{-1}$ . After that, an obvious activation process happens, which leads to the increase of specific capacity from  $154.3 \text{ mAh g}^{-1}$  (for the 1<sup>st</sup> cycle) to  $207.5 \text{ mAh g}^{-1}$  (for the 6<sup>th</sup> cycle) and then gradually decrease to  $192.7 \text{ mAh g}^{-1}$  for the 50<sup>th</sup> cycle. Although the raw  $V_2O_5$  powder displays stable discharge specific capacity during the subsequent cycles, the absolute value of its capacity is much lower than that of the sample with milling and sintering ( $218.2 \text{ mAh g}^{-1}$  for the 1<sup>st</sup> cycle; highest value  $247.8 \text{ mAh g}^{-1}$  for the 3<sup>rd</sup>;  $212.6 \text{ mAh g}^{-1}$  for the 50<sup>th</sup>) as well as the  $TiO_2$ -coated one ( $212.3 \text{ mAh g}^{-1}$  for the 1<sup>st</sup> cycle; highest value  $246.6 \text{ mAh g}^{-1}$  for the

5<sup>th</sup>; 229.1 mAh g<sup>-1</sup> for the 50<sup>th</sup>). The lower discharge capacity of raw V<sub>2</sub>O<sub>5</sub> powder may be owing to its larger particle size and irregular morphology which could not be fully utilized upon electrochemical reaction. It is noteworthy that the raw V<sub>2</sub>O<sub>5</sub> undergoes a distinct activation process, which is due to its large and irregular particle size. During electrochemical reaction, lithium ions migrate into active material from electrolyte and diffuse within it. If the contact between active material and electrolyte is not so good or the size of active particle is too large, lithium ions cannot insert into active material and occupy the active site adequately in the early stage [1-4]. Consequently, the highest specific capacity value will not reach at the first cycle but a certain one at the subsequent cycles.

**References:**

- [1] X. Feng, Y.R. Gao, L.B. Ben, Z.Z. Yang, Z.X. Wang and L.Q. Chen, *J. Power Sources*, 2016, **317**, 74.
- [2] G.R. Li, X. Feng, Y. Ding, S.H. Ye, X.P. Gao, *Electrochim. Acta*, 2012, **78**, 308.
- [3] X.P. Gao and H.X. Yang, *Energy Environ. Sci.*, 2010, **3**, 174.
- [4] C. Lai, X.P. Gao, B. Zhang, T.Y. Yan and Z. Zhou, *J. Phys. Chem. C*, 2009, **113**, 4712.
